# Supplementary material for: Temporal Expression of a Master Regulator Drives Synchronous Sporulation in Budding Yeast
Source: Oxford University Press journal article supplement (doi:10.1534/g3.116.034983), 2016-10-07
Supplement: 034983_tables1.pdf [file 034983_tables1.pdf]

**Table S1.** Genotype of strains used in this study.

| Strain | Genotype                                                                                                                                                                                                                                                                                                                                 |
|--------|------------------------------------------------------------------------------------------------------------------------------------------------------------------------------------------------------------------------------------------------------------------------------------------------------------------------------------------|
| FW1208 | <i>MATa</i> , <i>ho::LYS2, ura3, leu2::hisG, his3::hisG, trp1::hisG, UME6-3V5::HIS3</i><br><i>MATα</i> , <i>ho::LYS2, ura3, leu2::hisG, his3::hisG, trp1::hisG, UME6-3V5::HIS3</i>                                                                                                                                                       |
| FW1509 | <i>MATa</i> , <i>ho::LYS2, lys2, ura3, leu2::hisG, his3::hisG, trp1::hisG</i>                                                                                                                                                                                                                                                            |
| FW1510 | <i>MATα</i> , <i>ho::LYS2, lys2, ura3, leu2::hisG, his3::hisG, trp1::hisG</i>                                                                                                                                                                                                                                                            |
| FW1511 | <i>MATa</i> , <i>ho::LYS2, lys2, ura3, leu2::hisG, his3::hisG, trp1::hisG</i><br><i>MATα</i> , <i>ho::LYS2, lys2, ura3, leu2::hisG, his3::hisG, trp1::hisG</i>                                                                                                                                                                           |
| FW1541 | <i>MATa</i> , <i>ho::LYS2, lys2, ura3, leu2::hisG, his3::hisG, trp1::hisG</i><br><i>ndt80::pGAL-NDT80::TRP1, ura3::pGPD1-GAL4(848).ER::URA3</i><br><i>MATα</i> , <i>ho::LYS2, lys2, ura3, leu2::hisG, his3::hisG, trp1::hisG</i><br><i>ndt80::pGAL-NDT80::TRP1, ura3::pGPD1-GAL4(848).ER::URA3</i>                                       |
| FW1810 | <i>MATa</i> , <i>ho::LYS2, lys2, ura3, leu2::hisG, his3::hisG, trp1::hisG, irt1::pCUP-3HA-IME1::KANMX, ime4::pCUP-3HA-IME4::KANMX</i><br><i>MATα</i> , <i>ho::LYS2, lys2, ura3, leu2::hisG, his3::hisG, trp1::hisG, irt1::pCUP-3HA-IME1::KANMX, ime4::pCUP-3HA-IME4::KANMX</i>                                                           |
| FW2444 | <i>MATa</i> , <i>ho::LYS2, lys2, ura3, leu2::hisG, his3::hisG, trp1::hisG, irt1::pCUP-3HA-IME1::KANMX</i><br><i>MATα</i> , <i>ho::LYS2, lys2, ura3, leu2::hisG, his3::hisG, trp1::hisG, irt1::pCUP-3HA-IME1::KANMX</i>                                                                                                                   |
| FW2480 | <i>MATa</i> , <i>ho::LYS2, lys2, ura3, leu2::hisG, his3::hisG, trp1::hisG, ime4::pCUP-3HA-IME4::KANMX</i><br><i>MATα</i> , <i>ho::LYS2, lys2, ura3, leu2::hisG, his3::hisG, trp1::hisG, ime4::pCUP-3HA-IME4::KANMX</i>                                                                                                                   |
| FW2795 | <i>MATa</i> , <i>ho::LYS2, lys2, ura3, leu2::hisG, his3::hisG, trp1::hisG, irt1::pCUP-3HA-IME1::HPHMX, ndt80::pGAL-NDT80::TRP1, ura3::pGPD1-GAL4(848).ER::URA3</i><br><i>MATα</i> , <i>ho::LYS2, lys2, ura3, leu2::hisG, his3::hisG, trp1::hisG, irt1::pCUP-3HA-IME1::HPHMX, ndt80::pGAL-NDT80::TRP1, ura3::pGPD1-GAL4(848).ER::URA3</i> |
